# Supplementary material for: Interindividual differences in aronia juice tolerability linked to gut microbiome and metabolome changes—secondary analysis of a randomized placebo-controlled parallel intervention trial
Source: PubMed Central journal article supplement (PMC10924357; doi:10.1186/s40168-024-01774-4), 2024-03-09

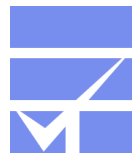

# CONSORT

TRANSPARENT REPORTING of TRIALS

## CONSORT 2010 Flow Diagram

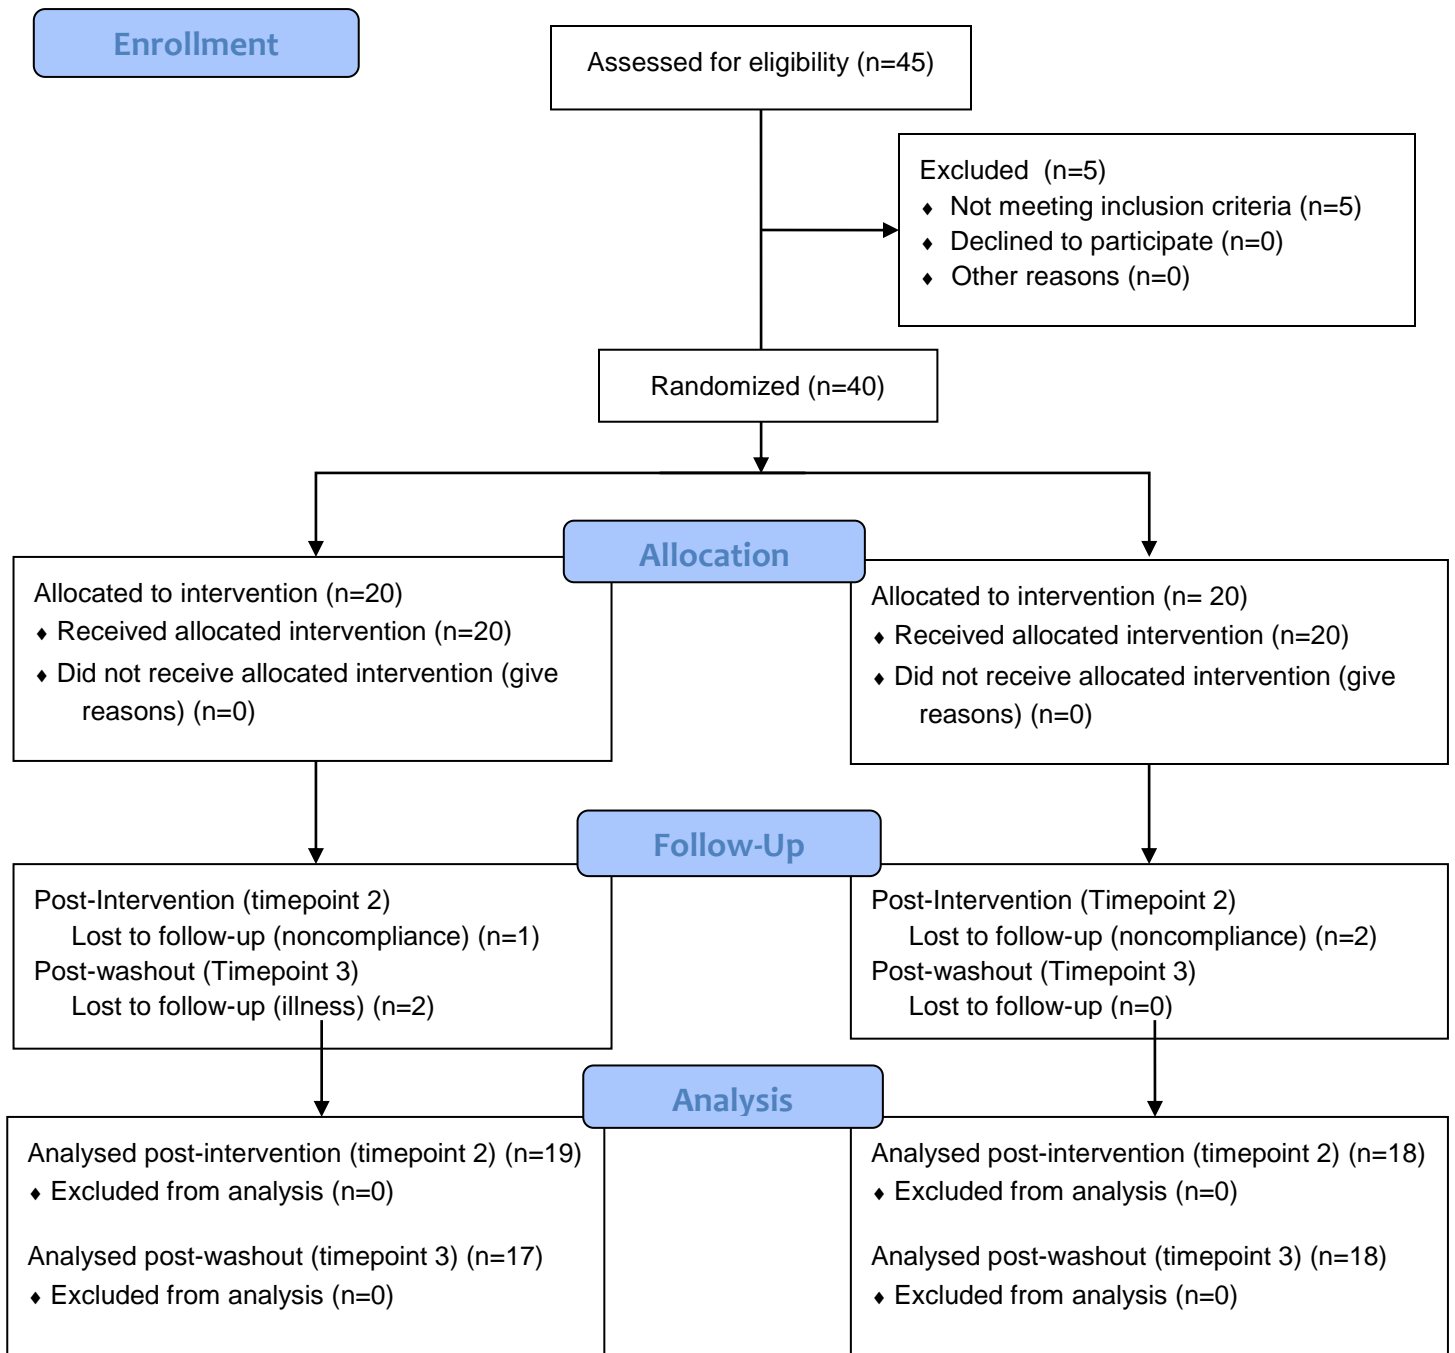

Supplement: 40168_2024_1774_MOESM1_ESM.pdf [file 40168_2024_1774_MOESM1_ESM.pdf]
