# Supplementary material for: Interindividual differences in aronia juice tolerability linked to gut microbiome and metabolome changes—secondary analysis of a randomized placebo-controlled parallel intervention trial
Source: PubMed Central journal article supplement (PMC10924357; doi:10.1186/s40168-024-01774-4), 2024-03-09
Supplement: 40168_2024_1774_MOESM2_ESM.pdf [file 40168_2024_1774_MOESM2_ESM.pdf]

We conducted effect size and power calculations with q2-evident (<https://github.com/biocore/evident>) on the microbiome data and the predicted flux of metabolites in our study. As suggested, the main groups “Placebo” (n=56) and “Verum” (n=56) were compared to the finer and smaller groupings of “Pc t1 (n=1), Pc t2 (n=1), Pc t3 (n=1), Pt t1 (n=17), Pt t2 (n=17), Pt t3 (n=17), Vc t1 (n=10), Vc t2 (n=10), Vc t3 (n=9), Vt t1 (n=9), Vt t2 (n=9), Vt t3 (n=8) we used in our datasets (Pc = Placebo complaints, Pt = Placebo tolerated, Vc = Verum complaints, Vt = Verum tolerated).

First, we conducted univariate power analysis based on microbial diversity (Shannon entropy) for the main group “Placebo” and “Verum”, and visualized the results as power curves for a target power (1 - beta) of 0.8, at an alpha of 0.01, 0.05, and 0.1 for 10 to 1000 observations in 100 steps.

In this case, the intersection of the power curve with the target power (1 - beta) was around ~100 observations for an alpha at 0.05 (see Fig.1).

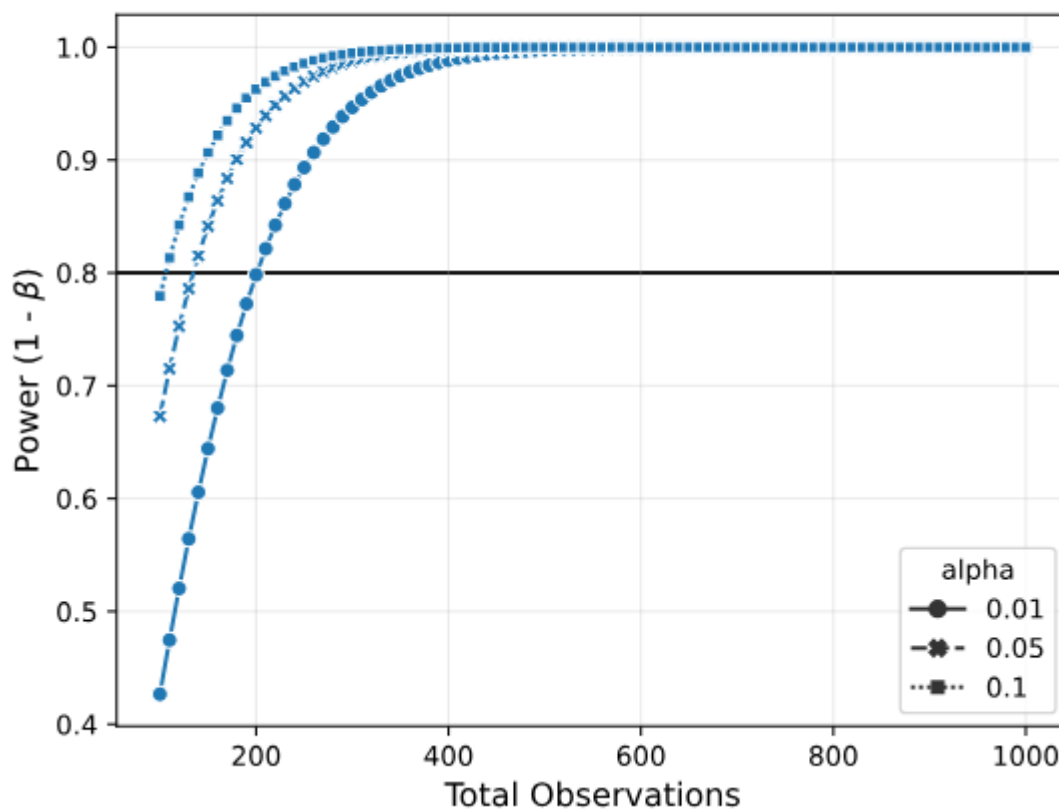

Fig. 1: Power curve based on univariate power calculations for microbial diversity using Shannon entropy for the groups Placebo and Verum at different alpha's.

We did the same for the finer and smaller groupings we used in our study. According to this plotted power curve, this analysis revealed a shift of the power curve with the target power ( $1 - \beta$ ) to ~180 observations for an alpha at 0.05 (see Fig. 2).

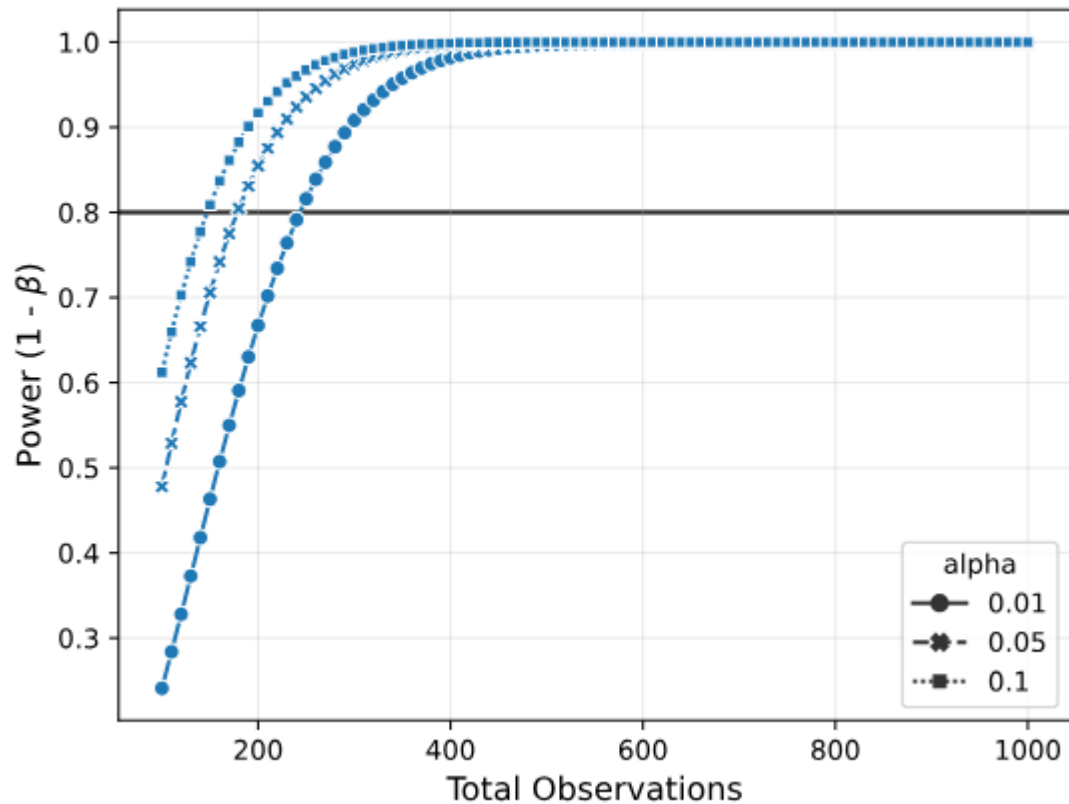

Fig. 2: Power curve based on univariate power calculations for microbial diversity using Shannon entropy for the groups Placebo complaints, Placebo tolerated, Verum complaints and Verum tolerated at all three timepoints and at different alpha's.

In addition to the univariate power analysis we also conducted a multivariate power analysis based on distances in microbial composition (Bray-Curtis distances) for the different groups in our datasets.

For the main group “Placebo” and “Verum” the multivariate power analysis was visualized as power curves for a target power ( $1 - \beta$ ) of 0.8, at an alpha of 0.01, 0.05, and 0.1 for 10 to 1000 observations in 100 steps.

Regarding microbial distances, the intersection of the power curve with the target power ( $1 - \beta$ ) dropped to ~100 observations for an alpha at 0.05 (see Fig.3) in comparison to the univariate analysis for microbial diversity we presented above.

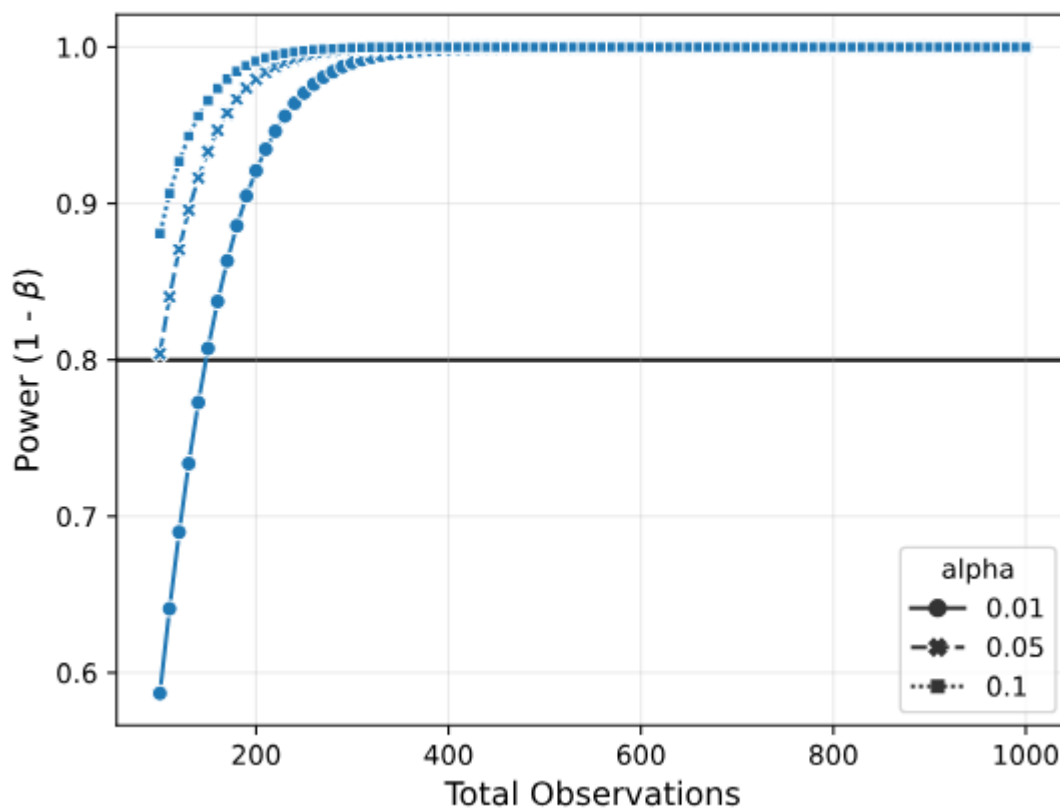

Fig. 3: Power curve based on multivariate power calculations for microbial composition using Bray-Curtis distances for the groups Placebo and Verum at different alpha's.

Again, we did the same analyses for the finer and smaller groupings we used in our study. According to this plotted power curve, this analysis revealed only a slight shift of the power curve with the target power ( $1 - \beta$ ) to  $>100$  observations for an alpha at 0.05 (see Fig. 4).

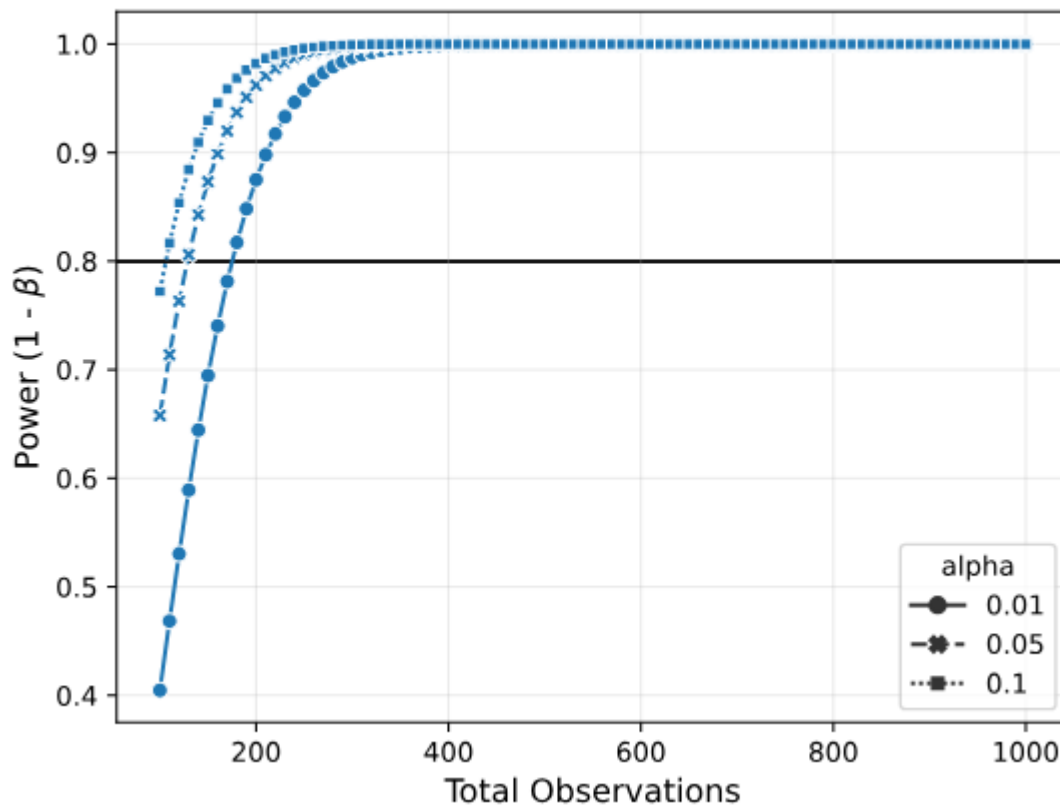

Fig. 4: Power curve based on multivariate power calculations for microbial composition using Bray-Curtis distances for the groups Placebo complaints, Placebo tolerated, Verum complaints and Verum tolerated at all three timepoints and at different alpha's.

As a conclusion for the taxa specific microbiome analysis, we also calculated all pairwise effect sizes for each of the used metadata categories. The following table shows the results for Shannon entropy (Table 1) and Bray-Curtis distances (Table 2) we used.

This analysis revealed that the effect size (based on Cohen's d) was not the highest for the main groups and higher effect sizes could be achieved even at the finer and smaller groupings we used in the study.

Table 1: Univariate effect size calculations by the used metadata categories based on microbial diversity expressed by Shannon entropy.

| <u>effect_size</u> | <u>metric</u> | <u>column</u> | <u>group_1</u>       | <u>group_2</u>       |
|--------------------|---------------|---------------|----------------------|----------------------|
| 0.979301075        | cohens_d      | group2        | Verum tolerated t2   | Verum tolerated t3   |
| 0.947064767        | cohens_d      | group2        | Placebo tolerated t2 | Verum tolerated t2   |
| 0.871167878        | cohens_d      | group2        | Placebo tolerated t2 | Verum tolerated t1   |
| 0.818170816        | cohens_d      | group2        | Verum tolerated t1   | Verum tolerated t3   |
| 0.748848172        | cohens_d      | group2        | Placebo tolerated t3 | Verum tolerated t2   |
| 0.711200236        | cohens_d      | group2        | Placebo tolerated t1 | Verum tolerated t2   |
| 0.708582034        | cohens_d      | group2        | Placebo tolerated t3 | Verum tolerated t1   |
| 0.695770274        | cohens_d      | group2        | Placebo tolerated t2 | Verum complaints t1  |
| 0.660562828        | cohens_d      | group2        | Placebo tolerated t1 | Verum tolerated t1   |
| 0.602628717        | cohens_d      | group2        | Placebo tolerated t3 | Verum complaints t1  |
| 0.585562733        | cohens_d      | group2        | Verum complaints t2  | Verum tolerated t2   |
| 0.567999367        | cohens_d      | group2        | Verum complaints t1  | Verum tolerated t3   |
| 0.539707058        | cohens_d      | group2        | Verum complaints t3  | Verum tolerated t2   |
| 0.537963365        | cohens_d      | group2        | Placebo tolerated t1 | Verum complaints t1  |
| 0.530228348        | cohens_d      | group2        | Verum complaints t2  | Verum tolerated t1   |
| 0.48647091         | cohens_d      | group         | Placebo              | Verum                |
| 0.473096718        | cohens_d      | group2        | Verum complaints t3  | Verum tolerated t1   |
| 0.413877747        | cohens_d      | group2        | Verum complaints t1  | Verum complaints t2  |
| 0.400965471        | cohens_d      | group2        | Placebo tolerated t2 | Verum complaints t3  |
| 0.350504895        | cohens_d      | group2        | Verum complaints t1  | Verum complaints t3  |
| 0.313212502        | cohens_d      | group2        | Placebo tolerated t3 | Verum complaints t3  |
| 0.306124158        | cohens_d      | group2        | Verum complaints t3  | Verum tolerated t3   |
| 0.275630496        | cohens_d      | group2        | Placebo tolerated t2 | Verum complaints t2  |
| 0.214231665        | cohens_d      | group2        | Placebo tolerated t3 | Verum complaints t2  |
| 0.209918319        | cohens_d      | group2        | Placebo tolerated t1 | Verum complaints t3  |
| 0.175545641        | cohens_d      | group2        | Placebo tolerated t1 | Placebo tolerated t2 |
| 0.168335633        | cohens_d      | group2        | Verum complaints t2  | Verum tolerated t3   |
| 0.130486958        | cohens_d      | group2        | Placebo tolerated t1 | Placebo tolerated t3 |
| 0.126303077        | cohens_d      | group2        | Placebo tolerated t2 | Verum tolerated t3   |
| 0.10115726         | cohens_d      | group2        | Placebo tolerated t1 | Verum complaints t2  |
| 0.098532579        | cohens_d      | group2        | Verum complaints t2  | Verum complaints t3  |
| 0.079389671        | cohens_d      | group2        | Placebo tolerated t3 | Verum tolerated t3   |
| 0.061757841        | cohens_d      | group2        | Placebo tolerated t1 | Verum tolerated t3   |
| 0.024641472        | cohens_d      | group2        | Placebo tolerated t2 | Placebo tolerated t3 |
| 0.011522069        | cohens_d      | group2        | Verum complaints t1  | Verum tolerated t2   |
| 0.006814042        | cohens_d      | group2        | Verum complaints t1  | Verum tolerated t1   |
| 0.006303862        | cohens_d      | group2        | Verum tolerated t1   | Verum tolerated t2   |

Table 2: Multivariate effect size calculations by the used metadata categories based on microbial composition expressed by Bray-Curtis distances.

| <b>effect_size</b> | <b>metric</b> | <b>column</b> | <b>group_1</b>       | <b>group_2</b>       |
|--------------------|---------------|---------------|----------------------|----------------------|
| 1.056199715        | cohens_d      | group2        | Placebo tolerated t1 | Verum tolerated t1   |
| 1.00436733         | cohens_d      | group2        | Placebo tolerated t1 | Verum tolerated t2   |
| 0.939770994        | cohens_d      | group2        | Placebo tolerated t2 | Verum tolerated t1   |
| 0.894804396        | cohens_d      | group2        | Placebo tolerated t2 | Verum tolerated t2   |
| 0.826313524        | cohens_d      | group2        | Placebo tolerated t3 | Verum tolerated t1   |
| 0.815386649        | cohens_d      | group2        | Placebo tolerated t1 | Verum complaints t1  |
| 0.777426284        | cohens_d      | group2        | Placebo tolerated t1 | Verum complaints t3  |
| 0.77358479         | cohens_d      | group2        | Placebo tolerated t3 | Verum tolerated t2   |
| 0.725897823        | cohens_d      | group2        | Placebo tolerated t2 | Verum complaints t1  |
| 0.716389624        | cohens_d      | group2        | Verum complaints t2  | Verum tolerated t1   |
| 0.678377731        | cohens_d      | group2        | Placebo tolerated t2 | Verum complaints t3  |
| 0.653372832        | cohens_d      | group2        | Verum complaints t2  | Verum tolerated t2   |
| 0.627963423        | cohens_d      | group2        | Verum tolerated t1   | Verum tolerated t3   |
| 0.572492104        | cohens_d      | group2        | Placebo tolerated t3 | Verum complaints t1  |
| 0.568730168        | cohens_d      | group         | Placebo              | Verum                |
| 0.562394755        | cohens_d      | group2        | Verum tolerated t2   | Verum tolerated t3   |
| 0.517849199        | cohens_d      | group2        | Placebo tolerated t3 | Verum complaints t3  |
| 0.472197644        | cohens_d      | group2        | Placebo tolerated t1 | Verum tolerated t3   |
| 0.452225974        | cohens_d      | group2        | Verum complaints t1  | Verum complaints t2  |
| 0.429488292        | cohens_d      | group2        | Verum complaints t2  | Verum complaints t3  |
| 0.401840512        | cohens_d      | group2        | Placebo tolerated t2 | Verum tolerated t3   |
| 0.387891749        | cohens_d      | group2        | Placebo tolerated t1 | Verum complaints t2  |
| 0.363016478        | cohens_d      | group2        | Verum complaints t1  | Verum tolerated t3   |
| 0.361058653        | cohens_d      | group2        | Verum complaints t3  | Verum tolerated t1   |
| 0.341424624        | cohens_d      | group2        | Verum complaints t3  | Verum tolerated t3   |
| 0.32720916         | cohens_d      | group2        | Placebo tolerated t2 | Verum complaints t2  |
| 0.303442447        | cohens_d      | group2        | Verum complaints t3  | Verum tolerated t2   |
| 0.295571309        | cohens_d      | group2        | Placebo tolerated t1 | Placebo tolerated t3 |
| 0.247688746        | cohens_d      | group2        | Placebo tolerated t2 | Placebo tolerated t3 |
| 0.208236826        | cohens_d      | group2        | Verum complaints t1  | Verum tolerated t1   |
| 0.198380328        | cohens_d      | group2        | Placebo tolerated t3 | Verum tolerated t3   |
| 0.167967494        | cohens_d      | group2        | Verum complaints t1  | Verum tolerated t2   |
| 0.105504737        | cohens_d      | group2        | Placebo tolerated t3 | Verum complaints t2  |
| 0.098477219        | cohens_d      | group2        | Verum complaints t1  | Verum complaints t3  |
| 0.093216458        | cohens_d      | group2        | Verum complaints t2  | Verum tolerated t3   |
| 0.036429779        | cohens_d      | group2        | Verum tolerated t1   | Verum tolerated t2   |
| 0.029623976        | cohens_d      | group2        | Placebo tolerated t1 | Placebo tolerated t2 |

To address the potential constraints of our metabolic modelling we conducted the same analyses again, but in this case all individual analyses were based on the predicted metabolites for the different taxa from micom in our study.

Indeed, the power curves were shifted and in general more samples would be necessary to achieve similar power as for the standard microbiome analyses for univariate and multivariate measures. However, shifts between main and finer smaller groups for univariate (>300 observations) and multivariate (>100 observations) power analysis revealed only minor changes (see Fig. 5 - 8).

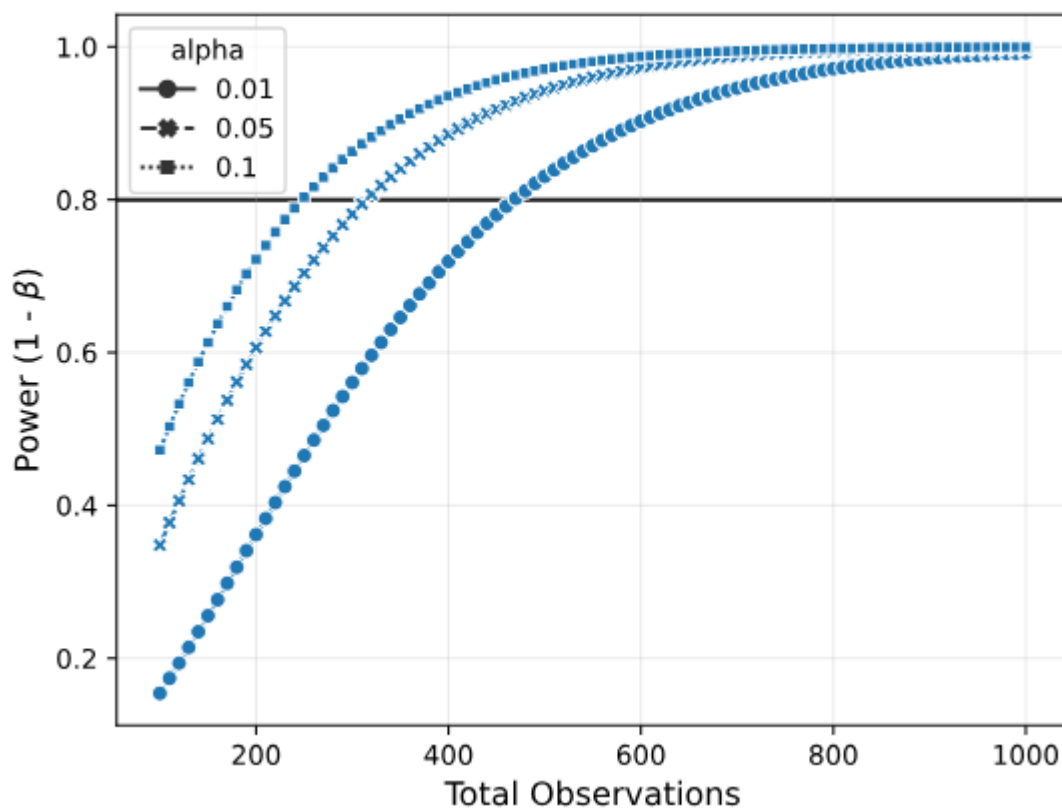

Fig. 5: Power curve based on univariate power calculations for predicted diversity of metabolites using Shannon entropy for the groups Placebo and Verum at different alpha's.

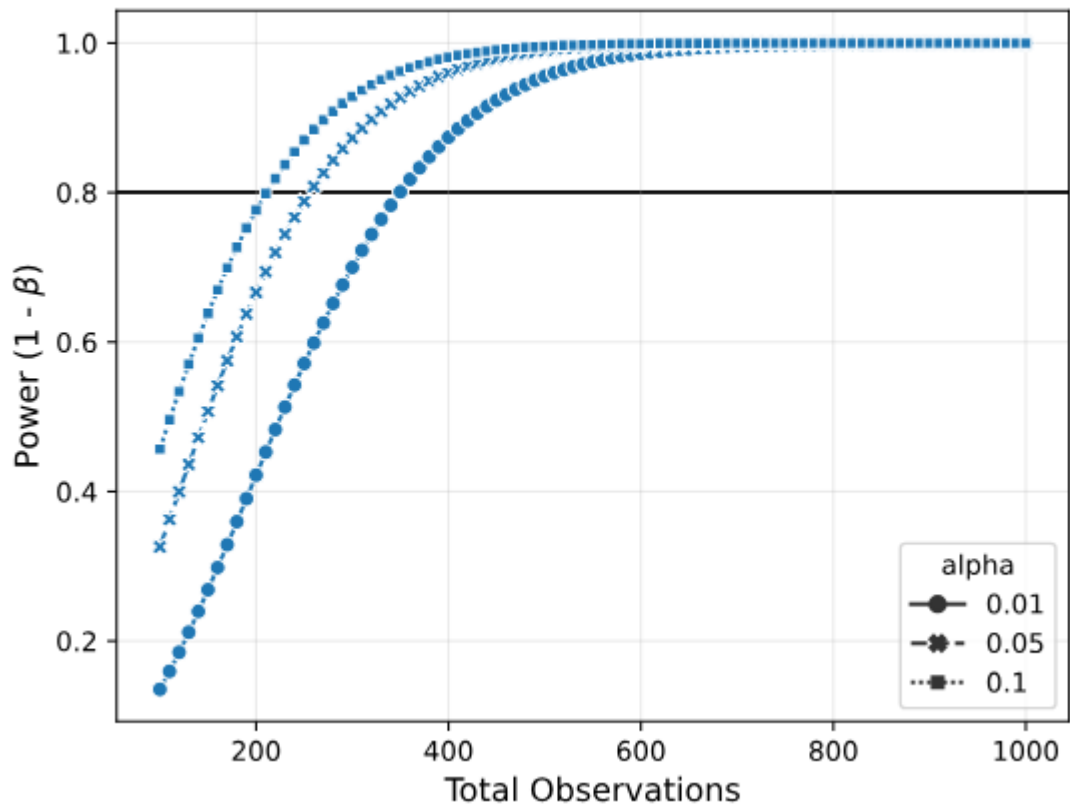

Fig. 6: Power curve based on univariate power calculations for predicted diversity of metabolites using Shannon entropy for the groups Placebo complaints, Placebo tolerated, Verum complaints and Verum tolerated at all three timepoints and at different alpha's.



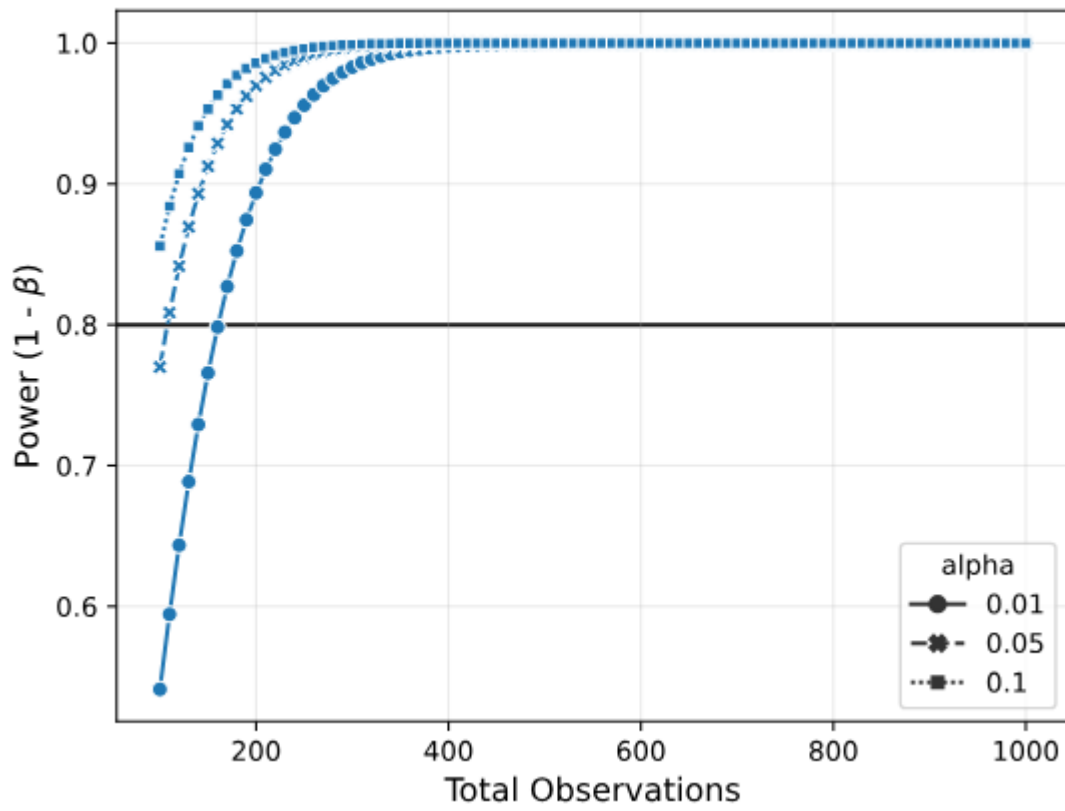

Fig. 7: Power curve based on multivariate power calculations for the composition of predicted metabolites using Bray-Curtis distances for the groups Placebo and Verum at different alpha's.

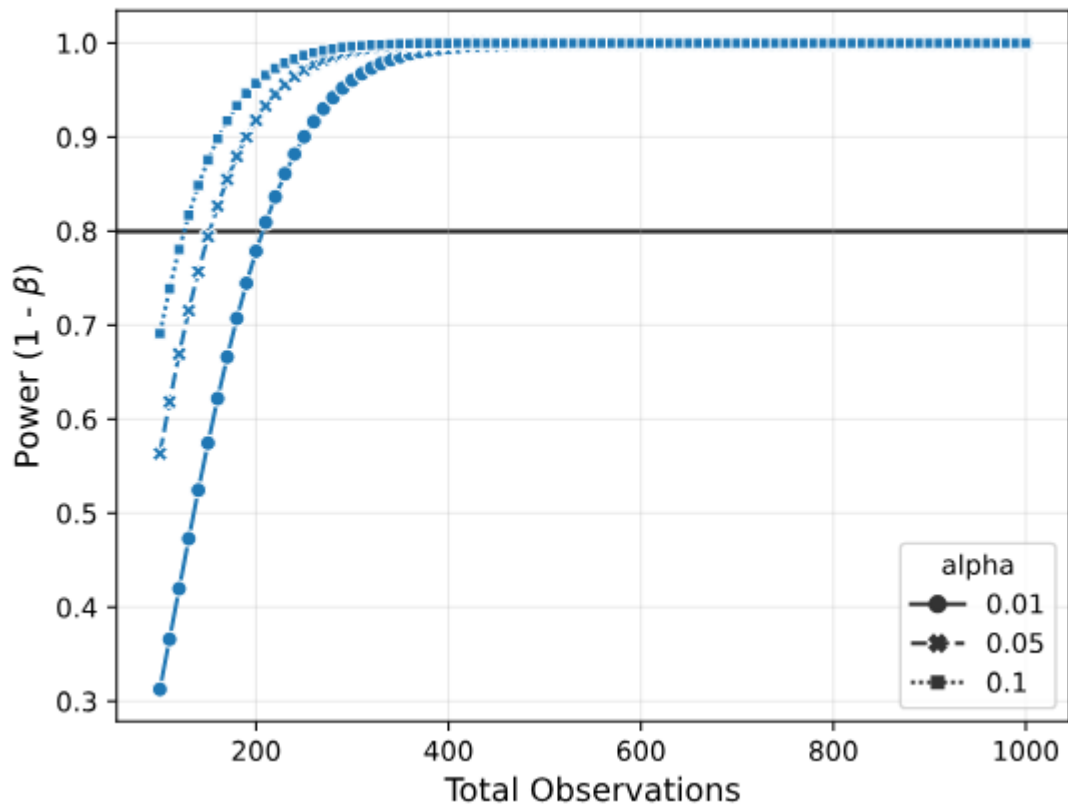

Fig. 8: Power curve based on multivariate power calculations for the composition of predicted metabolites using Bray-Curtis distances for the groups Placebo complaints, Placebo tolerated, Verum complaints and Verum tolerated at all three timepoints and at different alpha's.

As a conclusion for the predicted metabolic flux analysis, we also calculated all pairwise effect sizes for each of the used metadata categories again. The following table shows the results for Shannon entropy (Table 3) and Bray-Curtis distances (Table 4) we used.

Similarly, as seen before, this analysis revealed that the effect size (based on Cohen's d) was not the highest for the main groups and higher effect sizes could be achieved even at the finer and smaller groupings we used in the study.

Table 3: Univariate effect size calculations by the used metadata categories based on predicted metabolite diversity expressed by Shannon entropy.

| <b>effect_size</b> | <b>metric</b> | <b>column</b> | <b>group_1</b>       | <b>group_2</b>       |
|--------------------|---------------|---------------|----------------------|----------------------|
| 0.855399846        | cohens_d      | group2        | Placebo tolerated t3 | Verum tolerated t1   |
| 0.808006725        | cohens_d      | group2        | Placebo tolerated t3 | Verum complaints t1  |
| 0.646323406        | cohens_d      | group2        | Verum complaints t3  | Verum tolerated t1   |
| 0.645752722        | cohens_d      | group2        | Placebo tolerated t3 | Verum complaints t2  |
| 0.639823369        | cohens_d      | group2        | Placebo tolerated t2 | Verum tolerated t1   |
| 0.60573907         | cohens_d      | group2        | Placebo tolerated t2 | Verum complaints t1  |
| 0.565225941        | cohens_d      | group2        | Verum complaints t1  | Verum complaints t3  |
| 0.558536466        | cohens_d      | group2        | Placebo tolerated t3 | Verum tolerated t3   |
| 0.520462944        | cohens_d      | group2        | Placebo tolerated t3 | Verum tolerated t2   |
| 0.420223155        | cohens_d      | group2        | Placebo tolerated t1 | Placebo tolerated t3 |
| 0.419533024        | cohens_d      | group2        | Placebo tolerated t2 | Verum complaints t2  |
| 0.393170703        | cohens_d      | group2        | Verum complaints t2  | Verum complaints t3  |
| 0.337998505        | cohens_d      | group2        | Placebo tolerated t1 | Verum complaints t1  |
| 0.324387465        | cohens_d      | group2        | Placebo tolerated t2 | Verum tolerated t3   |
| 0.322048727        | cohens_d      | group2        | Placebo tolerated t2 | Placebo tolerated t3 |
| 0.318226829        | cohens_d      | group2        | Placebo tolerated t3 | Verum complaints t3  |
| 0.316925101        | cohens_d      | group         | Placebo              | Verum                |
| 0.309907476        | cohens_d      | group2        | Placebo tolerated t1 | Verum tolerated t1   |
| 0.303034702        | cohens_d      | group2        | Verum complaints t3  | Verum tolerated t3   |
| 0.295550827        | cohens_d      | group2        | Placebo tolerated t2 | Verum tolerated t2   |
| 0.269113482        | cohens_d      | group2        | Verum complaints t3  | Verum tolerated t2   |
| 0.228606008        | cohens_d      | group2        | Verum complaints t1  | Verum tolerated t3   |
| 0.212602067        | cohens_d      | group2        | Verum complaints t1  | Verum tolerated t2   |
| 0.203232416        | cohens_d      | group2        | Verum tolerated t1   | Verum tolerated t3   |
| 0.189050937        | cohens_d      | group2        | Placebo tolerated t1 | Verum complaints t2  |
| 0.181395847        | cohens_d      | group2        | Verum tolerated t1   | Verum tolerated t2   |
| 0.171299834        | cohens_d      | group2        | Placebo tolerated t1 | Placebo tolerated t2 |
| 0.159104375        | cohens_d      | group2        | Placebo tolerated t1 | Verum complaints t3  |
| 0.151410438        | cohens_d      | group2        | Verum complaints t1  | Verum complaints t2  |
| 0.108045924        | cohens_d      | group2        | Placebo tolerated t1 | Verum tolerated t3   |
| 0.107114163        | cohens_d      | group2        | Verum complaints t2  | Verum tolerated t1   |
| 0.102797423        | cohens_d      | group2        | Placebo tolerated t1 | Verum tolerated t2   |
| 0.080367773        | cohens_d      | group2        | Verum complaints t2  | Verum tolerated t3   |
| 0.074589319        | cohens_d      | group2        | Verum complaints t2  | Verum tolerated t2   |
| 0.06993847         | cohens_d      | group2        | Verum complaints t1  | Verum tolerated t1   |
| 0.004468193        | cohens_d      | group2        | Placebo tolerated t2 | Verum complaints t3  |
| 0.000192246        | cohens_d      | group2        | Verum tolerated t2   | Verum tolerated t3   |

Table 4: Multivariate effect size calculations by the used metadata categories based on predicted metabolite composition expressed by Bray-Curtis distances.

| effect_size | metric   | column | group_1              | group_2              |
|-------------|----------|--------|----------------------|----------------------|
| 1.103118308 | cohens_d | group2 | Placebo tolerated t2 | Verum tolerated t2   |
| 1.001567582 | cohens_d | group2 | Placebo tolerated t3 | Verum tolerated t2   |
| 0.826654574 | cohens_d | group2 | Placebo tolerated t2 | Verum complaints t1  |
| 0.796411231 | cohens_d | group2 | Placebo tolerated t1 | Verum tolerated t2   |
| 0.770317827 | cohens_d | group2 | Placebo tolerated t3 | Verum complaints t1  |
| 0.719520314 | cohens_d | group2 | Placebo tolerated t2 | Verum tolerated t1   |
| 0.692224433 | cohens_d | group2 | Placebo tolerated t3 | Verum tolerated t1   |
| 0.580587094 | cohens_d | group2 | Placebo tolerated t3 | Verum complaints t3  |
| 0.571420685 | cohens_d | group2 | Placebo tolerated t2 | Verum complaints t3  |
| 0.569018067 | cohens_d | group2 | Placebo tolerated t3 | Verum complaints t2  |
| 0.545091704 | cohens_d | group  | Placebo              | Verum                |
| 0.542174844 | cohens_d | group2 | Placebo tolerated t2 | Verum complaints t2  |
| 0.539268902 | cohens_d | group2 | Placebo tolerated t3 | Verum tolerated t3   |
| 0.520364662 | cohens_d | group2 | Placebo tolerated t1 | Verum complaints t1  |
| 0.519543026 | cohens_d | group2 | Placebo tolerated t2 | Verum tolerated t3   |
| 0.467334192 | cohens_d | group2 | Verum complaints t3  | Verum tolerated t2   |
| 0.449469908 | cohens_d | group2 | Verum tolerated t2   | Verum tolerated t3   |
| 0.441447965 | cohens_d | group2 | Verum complaints t2  | Verum tolerated t2   |
| 0.430775039 | cohens_d | group2 | Placebo tolerated t1 | Verum tolerated t1   |
| 0.35824225  | cohens_d | group2 | Verum tolerated t1   | Verum tolerated t2   |
| 0.342271932 | cohens_d | group2 | Placebo tolerated t1 | Placebo tolerated t3 |
| 0.300884036 | cohens_d | group2 | Placebo tolerated t1 | Verum complaints t3  |
| 0.292836728 | cohens_d | group2 | Verum complaints t1  | Verum tolerated t2   |
| 0.291115278 | cohens_d | group2 | Placebo tolerated t1 | Verum complaints t2  |
| 0.264439285 | cohens_d | group2 | Placebo tolerated t1 | Verum tolerated t3   |
| 0.222359375 | cohens_d | group2 | Placebo tolerated t1 | Placebo tolerated t2 |
| 0.218072106 | cohens_d | group2 | Verum complaints t1  | Verum tolerated t3   |
| 0.213462164 | cohens_d | group2 | Verum complaints t1  | Verum complaints t3  |
| 0.193400394 | cohens_d | group2 | Verum complaints t1  | Verum complaints t2  |
| 0.165951089 | cohens_d | group2 | Placebo tolerated t2 | Placebo tolerated t3 |
| 0.13813087  | cohens_d | group2 | Verum tolerated t1   | Verum tolerated t3   |
| 0.12601857  | cohens_d | group2 | Verum complaints t3  | Verum tolerated t1   |
| 0.114286237 | cohens_d | group2 | Verum complaints t2  | Verum tolerated t1   |
| 0.084336005 | cohens_d | group2 | Verum complaints t1  | Verum tolerated t1   |
| 0.023459173 | cohens_d | group2 | Verum complaints t2  | Verum tolerated t3   |
| 0.023170414 | cohens_d | group2 | Verum complaints t3  | Verum tolerated t3   |
| 0.001878854 | cohens_d | group2 | Verum complaints t2  | Verum complaints t3  |

Hence, our comparative power analyses of microbial taxa and predicted metabolic fluxes suggest that a bigger cohort and more samples would have been necessary to determine significance, but our results were rather robust against the selected sub-groupings within our dataset.
